# Supplementary material
Source: PubMed Central journal article supplement (PMC3575100)

Type of file: figure

Label: Figure 1A

Filename: BK paper Supplemental Figure 1A.pdf

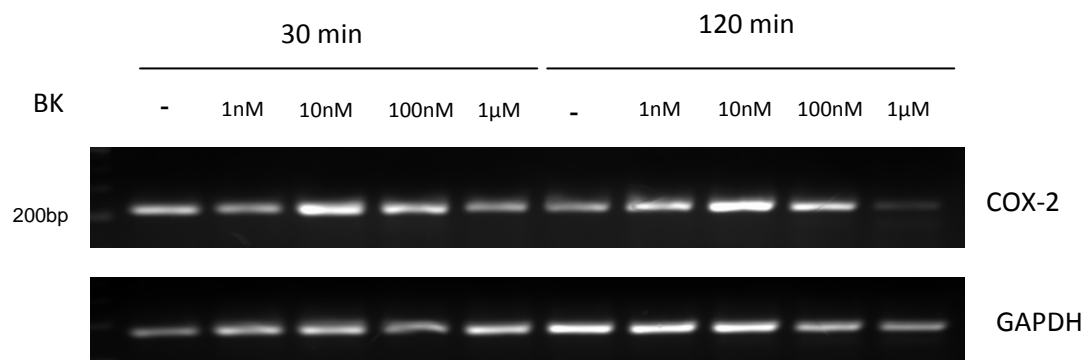

**Supplemental Fig. 1A. BK induction of COX-2 mRNA expression.** PCI-37A cells were serum-starved for 48hrs and treated with varying concentrations of BK for 30 minutes or 120 minutes. Total RNA was isolated using RNeasy mini kit (Qiagen) according to the manufacturer's protocol. COX-2 and GAPDH( internal control) mRNA expression was determined by reverse transcriptase PCR. Figure is a representation of 2 independent experiments. 2.5μg of RNA was reverse transcribed using Superscript First-strand synthesis kit (Invitrogen) according to the manufacturer's protocol. PCR was performed by addition of 1μl of cDNA in a 13μl reaction containing 1X PCR Master mix (Promega) and 0.5μM of both forward and reverse primers. Human COX-2 primer pair was obtained from R&D Systems. GAPDH primer sequences were: GAPDH forward: 5'-TGGAATTTGCCATGGGTG-3', GAPDH reverse: 5'-GTGAAGGTCGGAGTCAAC-3'. PCR amplification was carried out according to the following steps; 94°C for 4minutes, 30 cycles of 94°C for 45 seconds, 55°C for 1 minute, 72°C for 45 seconds followed by a final elongation step of for 10 minutes at 72°C. PCR products were resolved on a 2% agarose gel and visualized using the Kodak Image Station.

Type of file: figure

Label: Figure 1B

Filename: BK paper Supplemental Fig 1B.pdf

**Supplemental Fig 1B.** Quantitation of COX-2 RT-PCR results corrected for GAPDH expression levels, determined by densitometric scanning.

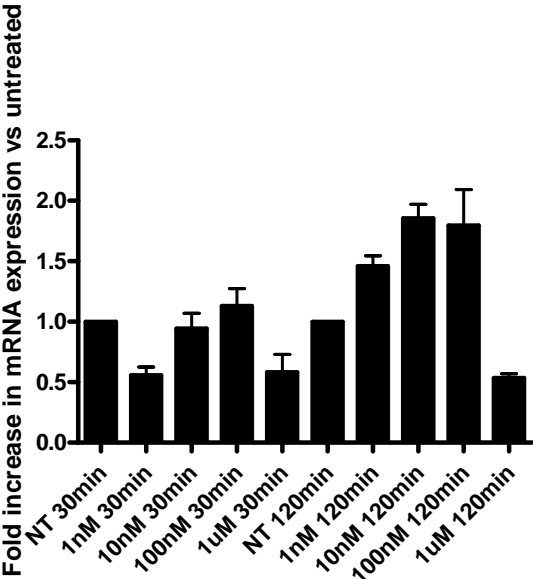

Supplement: NIHMS399547-supplement-01.pdf [file NIHMS399547-supplement-01.pdf]
